# Supplementary material for: Monograph of Coccinia (Cucurbitaceae)
Source: PhytoKeys. 2015 Aug 3;(54):1–166. doi: 10.3897/phytokeys.54.3285 (PMC4547038; doi:10.3897/phytokeys.54.3285)
Supplement: Supplementary material 2 — GenBank accessions [file phytokeys-054-001-s002.doc]

Table S2. Voucher information and GenBank accession numbers. Specimens included in this study, with the geographic origin of material (only country and 1st administrative division given) and GenBank accession numbers for all sequences. Herbarium acronyms (in parentheses behind the voucher name) follow Index Herbariorum.

| Species | No. | Voucher | Location | *mat*K | *ndh*F–  *rpl*32R IS | *rpl*20–  *rps*12 IS | *trn*L intron | *trn*L–  *trn*F IS | *trn*S–  *trn*G IS | *LFY* 2nd intron |
| --- | --- | --- | --- | --- | --- | --- | --- | --- | --- | --- |
| *C. abyssinica* (Lam.) Cogn. | 1 | *E. Westphal & J.M.C. Westphal-Stevels 1552* (WAG) | Ethiopia, Oromia Region | HQ608224 |  | HQ608311 |  |  | HQ608429 |  |
| *C. abyssinica* (Lam.) Cogn. | 2 | *E. Westphal & J.M.C. Westphal-Stevels 1951* (WAG) | Ethiopia, Oromia Region |  |  | HQ608312 | HQ608385 | HQ608368 | HQ608430 |  |
| *C. abyssinica* (Lam.) Cogn. | 3 | *N. Holstein 120* (M) | From seeds from Ethiopia, Oromia |  |  | JQ943386 |  |  | JQ943393 |  |
| *C. adoensis* (Hochst. ex A.Rich.) Cogn. | 1 | *L.E. Davidson 3781* (M) | South Africa, Gauteng | HQ608226 | HQ608274 | HQ608314 | HQ608396 | HQ608396 | HQ608432 |  |
| *C. adoensis* (Hochst. ex A.Rich.) Cogn. | 2 | *R. Story 6283* (M) | Namibia, Otjozondjupa | HQ608227 | HQ608275 | HQ608316 | HQ608397 | HQ608397 | HQ608434 | HQ608160 |
| *C. adoensis* (Hochst. ex A.Rich.) Cogn. | 3 | *J. Pawek 6124* (MO) | Malawi, Northern Region | HQ608225 |  | HQ608315 |  | HQ608369 | HQ608433 |  |
| *C. adoensis* (Hochst. ex A.Rich.) Cogn. | 4 | *R.E. Gereau &*  *C.J. Kayombo 3582* (MO) | Tanzania, Iringa | HQ608231 | HQ608273 | HQ608313 |  |  | HQ608431 |  |
| *C. adoensis* (Hochst. ex A.Rich.) Cogn. | 5 | *E.A. Robinson 2944* (M) | Zambia, Southern Prov. | HQ608228 |  | HQ608318 | HQ608398 | HQ608398 | HQ608436 |  |
| *C. adoensis* (Hochst. ex A.Rich.) Cogn. | 6 | *H. Merxmüller 282* (M) | South Africa, Gauteng | HQ608229 |  | HQ608319 |  | HQ608370 | HQ608437 |  |
| *C. adoensis* (Hochst. ex A.Rich.) Cogn. | 7 | *M. Sanane 375* (M) | Zambia, Northern Prov. | HQ608230 |  | HQ608320 | HQ608399 | HQ608399 | HQ608438 |  |
| *C. adoensis* (Hochst. ex A.Rich.) Cogn. | 8 | *A.R. Torre 5337* (M) | Mozambique, Zambezia |  |  | HQ608321 |  | HQ608371 | HQ608439 |  |
| *C. adoensis* (Hochst. ex A.Rich.) Cogn. | 9 | *D.K. Harder & M.G. Bingham 2584* (MO) | Zambia, Lusaka Prov. | HQ608268 | HQ608299 | HQ608364 |  |  | HQ608492 | HQ608191 |
| *C. adoensis* (Hochst. ex A.Rich.) Cogn. | 10 | *S.A. Robertson 1925* (MO) | Kenya, Eastern Prov. | HQ608232 |  | HQ608322 | HQ608400 | HQ608400 | HQ608440 |  |
| *C. adoensis* (Hochst. ex A.Rich.) Cogn. | 11 | *H.J.E, Schlieben 3271* (M) | Tanzania, Morogoro | HQ625501 |  | HQ608317 |  |  | HQ608435 |  |
| *C. adoensis* var. *aurantiaca*  C.Jeffrey (Holstein) | 1 | *M. Richards 20987* (BR) | Tanzania, Iringa | HQ608235 |  | HQ625507 | HQ608401 | HQ608401 | HQ608443 |  |
| *C.adoensis* var.*aurantiaca*  C.Jeffrey (Holstein) | 2 | *P.J. Greenway & Kanuri 14811* (M) | Tanzania, Iringa |  |  |  | HQ608402 | HQ608402 | HQ608444 | HQ608161 |
| *C.adoensis* var.*aurantiaca*  C.Jeffrey (Holstein) | 3 | *N. Holstein et al. 86* (M) | Tanzania, Dodoma | HQ608236 | HQ608276 | HQ608325 | HQ608403 | HQ608403 | HQ608445 | HQ608162 |
| *C.* adoensis var. *jeffreyana* Holstein | 1 | *J.C. Lovett 1597* (MO) | Tanzania, Iringa | HQ608233 |  | HQ608323 | HQ608386 | HQ608372 | HQ608441 |  |
| *C.* adoensis var. *jeffreyana* Holstein | 2 | *C.F. Paget-Wilkes 72* (MO) | Tanzania, Iringa | HQ608234 |  | HQ608324 |  | HQ608373 | HQ608442 |  |
| *C.* adoensis var. *jeffreyana* Holstein | 3 | *N. Holstein 125* (M) | From seeds from Kenya, Rift Valley Province | JQ943384 |  | JQ943391 |  |  | JQ943398 |  |
| *C. barteri* (Hook.f.) Keay | 1 | *E. Achigan-Dako 07 NIA 899* (GAT) | Guinea, Nzérékoré Region | HQ608237 |  | HQ608330 | HQ608404 | HQ608404 | HQ608450 |  |
| *C. barteri* (Hook.f.) Keay | 2 | *J.J. Wieringa 6387* (WAG) | Gabon, Haut-Ogooué | HQ608239 | HQ608277 | HQ608326 | HQ608405 | HQ608405 | HQ608446 | HQ608163 |
| *C. barteri* (Hook.f.) Keay | 3 | *E. Achigan-Dako 06 NIA 294* (GAT) | Guinea, Mamou Region |  |  | HQ608331 | HQ608389 | HQ608376 | HQ608451 |  |
| *C. barteri* (Hook.f.) Keay | 4 | *E. Achigan-Dako 07 NIA 809* (GAT) | Ghana, Eastern Region | HQ608240 |  | HQ608327 | HQ608387 | HQ608374 | HQ608447 | HQ608164 |
| *C. barteri* (Hook.f.) Keay | 5 | *W.J.J.O. de Wilde et al. 3726* (MO) | Cameroon, Central Region | HQ608241 |  | HQ608328 | HQ608388 | HQ608375 | HQ608448 |  |
| *C. barteri* (Hook.f.) Keay | 6 | *M.A. van Bergen 490* (WAG) | Gabon, Ogooué-Maritime | HQ608242 | HQ608278 | HQ608329 | HQ608406 | HQ608406 | HQ608449 | HQ608165 |
| *C. barteri* (Hook.f.) Keay | 7 | *F.J. Fernández-Casas 12077* (MO) | Equatorial Guinea, Bioco Island | HQ608238 | HQ608279 | HQ608332 | HQ608390 | HQ608377 | HQ608453 |  |
| *C. barteri* (Hook.f.) Keay | 8 | *E. Achigan-Dako 07 NIA 875* (GAT) | Guinea, Nzérékoré Region |  |  |  |  |  | HQ608452 |  |
| *C. grandiflora* Cogn. | 1 | *H. Schäfer 05/302* (M) | Tanzania, Tanga | HQ608243 | HQ608280 | HQ608333 | HQ608407 | HQ608407 | HQ608454 | HQ608166 |
| *C. grandiflora* Cogn. | 2 | *N. Holstein et al. 98* (M) | Tanzania, Tanga | HQ608244 | HQ608281 | HQ608334 | HQ608408 | HQ608408 | HQ608455 | HQ608167 |
| *C. grandis* (L.)  Voigt | 1 | *W.J.J.O. de Wilde & B.E.E. Duyfjes*  *22270* (L) | Thailand, Bangkok | DQ536651 | HQ608282 | DQ536537 | DQ536762 | DQ536762 | HQ608456 | HQ608168 |
| *C. grandis* (L.)  Voigt | 2 | *R. Müller s.n.,* Aug. 1999 (MSB) | Sudan, Sannar Prov. |  |  | HQ608335 | HQ608409 | HQ608409 | HQ608457 | HQ608169 |
| *C. grandis* (L.)  Voigt | 3 | *H. Schäfer 05/258* (M) | Tanzania, Pwani | HQ608245 | HQ608283 | HQ608336 | HQ608410 | HQ608410 | HQ608458 | HQ608170 |
| *C. heterophylla* (Hook.f.) Holstein |  | *C.C.H. Jongkind 5905* (WAG) | Gabon, Estuaire | HQ608246 |  | HQ608337 | HQ608411 | HQ608411 | HQ608459 | HQ608171 |
| *C. hirtella* Cogn. | 1 | *N. Holstein 29* (M) | J.-L. Gatard, France, wild source unknown | HQ608247 | HQ608284 | HQ608339 | HQ608412 | HQ608412 | HQ608461 | HQ608172 |
| *C. hirtella* Cogn. | 2 | *S.S. Renner & A. Kocyan 2447* (M) | J.-L. Gatard, France, wild source unknown | HQ608248 |  | HQ608338 | HQ608413 | HQ608413 | HQ608460 |  |
| *C. intermedia* Holstein | 1 | *C. Geerling & J. Bokdam 662* (MO) | Ivory Coast, Bouna area | HQ608269 | HQ608298 | HQ608363 |  | HQ608383 | HQ608491 |  |
| *C. intermedia* Holstein | 2 | *A. Akoègninou et al. 3625* (WAG0278370) | Benin, Atakora | JQ943382 | JQ943380 | JN653687 |  |  | JN653686 | JN653688 |
| *C. keayana*  R.Fern. | 1 | *F.C. Straub 140* (BR) | Liberia |  |  |  |  |  | HQ608462 |  |
| *C. keayana*  R.Fern. | 2 | *C.C H. Jongkind et al. 6542* (WAG) | Liberia, Grand Gedeh | HQ608249 | HQ608285 | HQ608340 |  | HQ608378 | HQ608463 | HQ608173 |
| *C. longicarpa* Jongkind |  | *C.C.H. Jongkind 3970* (WAG) | Ghana, Ashanti Region | HQ608250 | HQ608286 | HQ608341 | HQ608414 | HQ608414 | HQ608464 | HQ608174 |
| *C. mackenii* Naudin ex  C.Huber |  | *R.G. Strey 3762* (M) | South Africa, Mpumalanga | HQ608251 |  | HQ608343 | HQ608415 | HQ608415 | HQ608465 |  |
| *C. megarrhiza*  C.Jeffrey | 1 | *J.J.F.E. de Wilde 6501* (WAG) | Ethiopia, Oromia Region |  |  | HQ608344 | HQ608417 | HQ608417 | HQ608466 |  |
| *C. megarrhiza*  C.Jeffrey | 2 | *I. Friis et al. 2664* (MO) | Ethiopia, Oromia Region | HQ608252 | HQ608287 | HQ608347 | HQ608416 | HQ608416 | HQ608469 | HQ608176 |
| *C. megarrhiza*  C.Jeffrey | 3 | *P.C.M. Jansen 3471* (WAG) | Ethiopia, Oromia Region |  |  | HQ608345 |  |  | HQ608467 |  |
| *C. megarrhiza*  C.Jeffrey | 4 | *J.J.F.E. de Wilde* *4793* (WAG) | Ethiopia, Oromia Region | HQ608253 |  | HQ608346 |  |  | HQ608468 | HQ608175 |
| *C. megarrhiza*  C.Jeffrey | 5 | *N. Holstein 118* (M) | From seeds from Ethiopia, Oromia Region |  |  | JQ943387 |  |  | JQ943394 |  |
| *C. microphylla* Gilg | 1 | *R.B. Drummond & J.H. Hemsley 4087* (B) | Kenya, Coast Province | HQ608254 |  | HQ608348 |  |  | HQ608470 | HQ608177 |
| *C. microphylla* Gilg | 2 | *J.J.F.E. de Wilde & M.G. Gilbert 346* (UPS) | Ethiopia, Somali Regional State | HQ608255 |  | HQ608349 | HQ608418 | HQ608418 | HQ608471 | HQ608178 |
| *C. microphylla* Gilg | 3 | *N. Holstein 134* (M) | From seeds from Tanzania |  |  | JQ943388 |  |  | JQ943395 |  |
| *C. mildbraedii* Gilg ex Harms | 1 | *M. Reekmans 7399* (BR) | Burundi, Muramvya Prov. | HQ608256 |  | HQ608350 |  |  | HQ608472 |  |
| *C. mildbraedii* Gilg ex Harms | 2 | *N. Holstein et al. 76* (M) | Tanzania, Morogoro | HQ608257 | HQ608288 | HQ608351 | HQ608419 | HQ608419 | HQ608473 | HQ608179 |
| *C. ogadensis* Thulin |  | *M. Thulin et al. 11183* (UPS) | Ethiopia, Somali Regional State | HQ608258 | HQ608289 | HQ608352 |  |  | HQ608474 |  |
| *C. quinqueloba* (Thunb.) Cogn. |  | *R.D.A. Bayliss 8470* (M) | South Africa, Eastern Cape | HQ608259 | HQ608290 | HQ608353 | HQ608420 | HQ608420 | HQ608475 | HQ608180 |
| *C. racemiflora* Kéraudren | 1 | *I. van Nek 536* (WAG) | Gabon, Ogooué-Maritime |  |  | HQ608355 | HQ608421 | HQ608421 | HQ608477 | HQ608182 |
| *C. racemiflora* Kéraudren | 2 | *J.J. Bos 6590* (WAG) | Cameroon, South Prov. | HQ608260 |  | HQ608354 | HQ608391 | HQ608379 | HQ608476 | HQ608181 |
| *C. rehmannii* Cogn. | 1 | *S.S. Renner & A. Kocyan 2749* (M) | southern Africa, no detailed information | DQ536652 | HQ608292 | HQ625508 | DQ536799 | DQ536799 | HQ608479 | HQ608184 |
| *C. rehmannii* Cogn. var. *littoralis*  A. Meeuse | 2 | *L.E. Codd 9620* (M) | South Africa, KwaZulu-Natal | HQ608261 |  | HQ625509 | HQ608422 | HQ608422 | HQ608480 |  |
| *C. rehmannii* Cogn. var. *rehmannii* | 3 | *G. Woortman 217* (M) | Namibia, Otjozondjupa | HQ608262 |  | HQ625510 | HQ608392 | HQ608380 | HQ608481 | HQ608185 |
| *C. rehmannii* Cogn.*“ovifera”* | 4 | *B. de Winter &*  *O.A. Leistner 5598* (M) | Namibia, Kunene | HQ608263 | HQ608291 | HQ608356 | HQ608423 | HQ608423 | HQ608478 | HQ608183 |
| *C. rehmannii* aff. var. *littoralis* A.Meeuse | 5 | *N. Holstein 126* (M) | From seeds USDA 365066, wild coll. from SE South Africa | JQ943383 |  | JQ943390 | HQ625496 | HQ625496 | JQ943396 | JQ943381 |
| *C. samburuensis* Holstein |  | *R.B. & A.J. Faden 74/948* (WAG) | Kenya, Rift Valley Prov. | HQ608264 | HQ608293 | HQ608357 | HQ608393 | HQ608381 | HQ608482 | HQ608186 |
| *C. schliebenii* Harms | 1 | *E. Westphal & J.M.C. Westphal-Stevels 5539* (WAG) | Ethiopia, Oromia Region |  | HQ608294 | HQ608358 |  |  | HQ608483 |  |
| *C. schliebenii* Harms | 2 | *G.S. Laizer et al. 1449* (MO) | Tanzania, Morogoro | HQ608265 |  | HQ608359 |  | HQ608382 | HQ608484 | HQ608187 |
| *C. senensis* (Klotzsch) Cogn. | 1 | *N. Holstein et al. 66* (M) | Tanzania, Morogoro | HQ608266 | HQ608295 | HQ608360 | HQ608424 | HQ608424 | HQ608485 | HQ608188 |
| *C. senensis* (Klotzsch) Cogn. | 2 | *K. Vollesen MRC4316* (WAG) | Tanzania, Lindi | HQ608267 | HQ608296 | HQ608362 | HQ608425 | HQ608425 | HQ608487 | HQ608189 |
| *C. senensis* (Klotzsch) Cogn. | 3 | *A.R. Torre et al. 18788* (MO) | Mozambique, Tete |  |  | HQ608361 |  |  | HQ608486 |  |
| *C. senensis* (Klotzsch) Cogn. | 4 | *E.M.C. Groenendijk et al. 1031* (WAG) | Mozambique, Nampula |  |  | HQ625511 |  |  | HQ608489 |  |
| *C. senensis* (Klotzsch) Cogn. | 5 | *H.J.E. Schlieben 5259* (M) |  |  |  |  |  |  | HQ608488 |  |
| *C. sessilifolia* (Sond.) Cogn. var. *sessilifolia* |  | *S.S. Renner et al. 2763* (M) | Plant grown at Mainz Bot. G. (MJG19-54430); wild source unknown | AY968446 | HQ608297 | DQ648163 | AY968568 | AY968385 | HQ608490 | HQ608190 |
| *C. sessilifolia* var. *variifolia* (A.Meeuse) Holstein |  | *F.A. Rogers 24932* (Z000073427) | South Africa, Limpopo | JQ943385 |  | JQ943392 |  |  | JQ943399 |  |
| *C. subsessiliflora* Cogn. |  | *H. Fredericq in* *Herb. G.F. de Witte 8288* (M) | DR Congo, North Kivu | HQ608270 |  | HQ608365 | HQ608395 | HQ608384 | HQ608493 |  |
| *C. trilobata* (Cogn.)  C.Jeffrey | 1 | *N. Holstein & P. Sebastian 9* (M) | From seeds from J.-L. Gatard, France, coll. in Kenya | HQ608271 | HQ608300 | HQ608366 | HQ608426 | HQ608426 | HQ608494 |  |
| *C. trilobata* (Cogn.)  C.Jeffrey | 2 | *N. Holstein 135* (M) | From seeds from Kenya, Rift Valley Prov. |  |  | JQ943389 |  |  | JQ943397 |  |
| *Diplocyclos palmatus* (L.)  C.Jeffrey |  | *J. Maxwell s.n.* 2 Sep. 2002 | Thailand, Chiang Mai | DQ536671 | HQ608301 | DQ536625 | DQ536769 | DQ536769 | HQ608495 | HQ608192 |
| *Diplocyclos schliebenii* (Harms)  C.Jeffrey |  | *H.J.E. Schlieben 4363* (M) | Tanzania, Kilimanjaro |  |  |  | HQ608427 | HQ608427 | HQ608496 | HQ608193 |
| *Cucumis hirsutus* Sond. |  | *N.B. Zimba et al. 874* (MO) | Zambia | DQ536658 |  | DQ536542 | DQ536804 | DQ536804 | HM597074 |  |
| *Cucumis sativus* L. |  | unknown | unknown | AJ970307 | AJ970307 | AJ970307 | AJ970307 | AJ970307 | AJ970307 |  |
| *Peponium vogelii* (Hook.f.) Engl. |  | *S.S. Renner 2710* (M) | Tanzania, Tanga | HQ608272 | HQ608302 | HQ608367 | HQ608428 | HQ608428 | HQ608497 | HQ608194 |
| *Scopellaria marginata* (Bl.) W.de Wilde and Duyfjes |  | *A. Kocyan AK178* (BKF) | Thailand | DQ536751 |  | DQ536612 | DQ536804 | DQ536804 |  |  |
